# Supplementary material for: Clinically relevant T cell expansion media activate distinct metabolic programs uncoupled from cellular function
Source: PubMed Central journal article supplement — Mol Ther Methods Clin Dev. 2022 Feb 15;24:380–93. doi: 10.1016/j.omtm.2022.02.004 (PMC8897702; doi:10.1016/j.omtm.2022.02.004), 2022-02-15
Supplement: mmc1.pdf [file mmc1.pdf]

**OMTM, Volume 24**

**Supplemental information**

**Clinically relevant T cell expansion**

**media activate distinct metabolic**

**programs uncoupled from cellular function**

**Sarah MacPherson, Sarah Keyes, Marisa K. Kilgour, Julian Smazynski, Vanessa Chan, Jessica Sudderth, Tim Turcotte, Adria Devlieger, Jessie Yu, Kimberly S. Huggler, Jason R. Cantor, Ralph J. DeBerardinis, Christopher Siatskas, and Julian J. Lum**

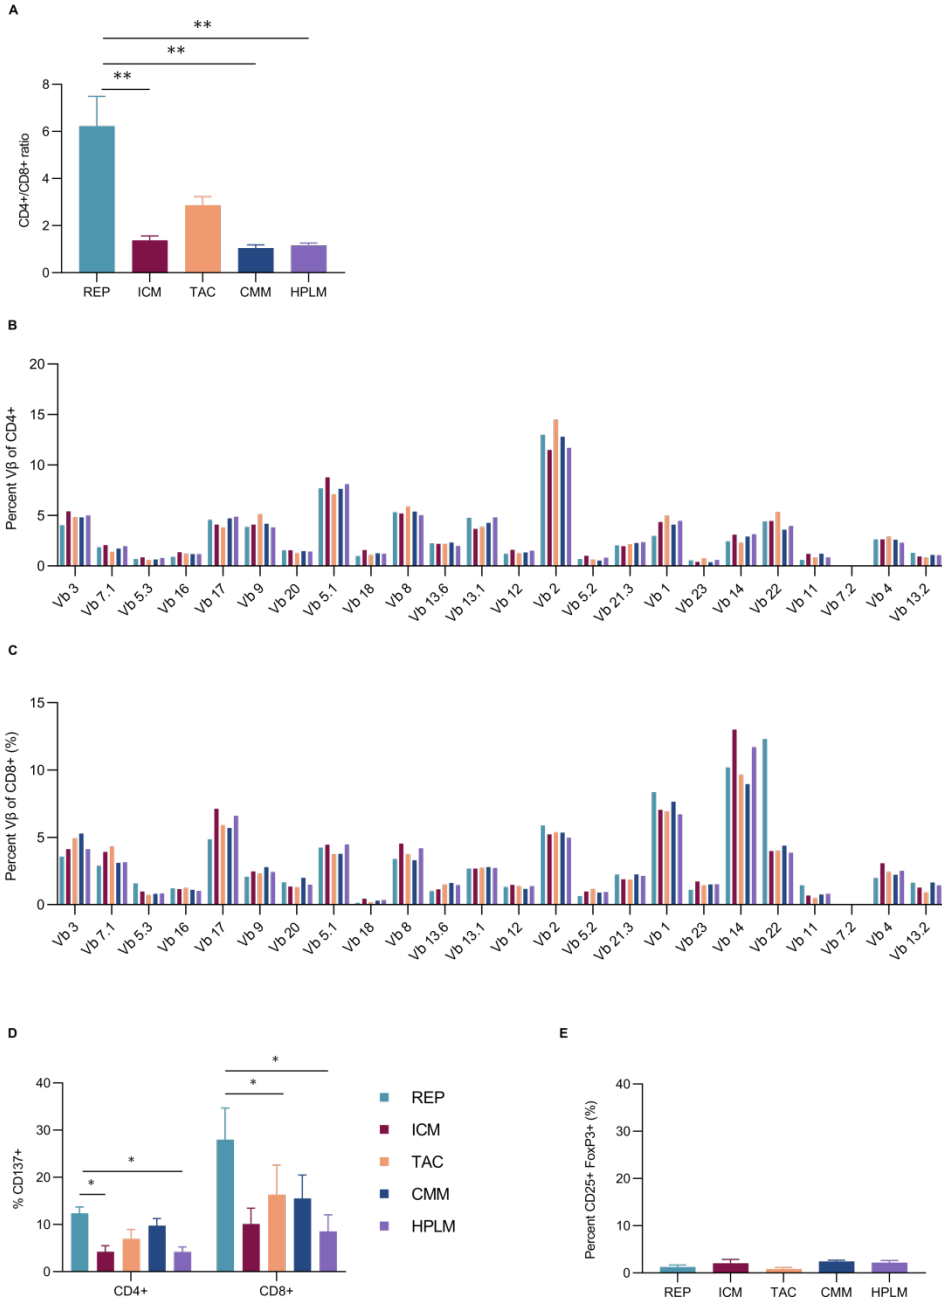

**Supplemental Figure 1:**(A) Ratio of CD4+ and CD8+ T cells of live CD3+ cells 12 days post-expansion. (B,C) Percent of (B) CD4+ and (C) CD8+ T cells positive for 24 TCR Vβ types following 12 days of expansion. Figure is a representative from one of 3 donors. (D) Percentage of CD137+ CD4+ and CD8+ cells. (E) Percentage of T<sub>reg</sub> cells (CD25+ FoxP3+; gated on live CD4+ cells). (A,D,E) Data are shown as mean of n=6 +SEM from healthy donors. Statistical significance was calculated by one-way ANOVA (\* p<0.05, \*\* p<0.01).

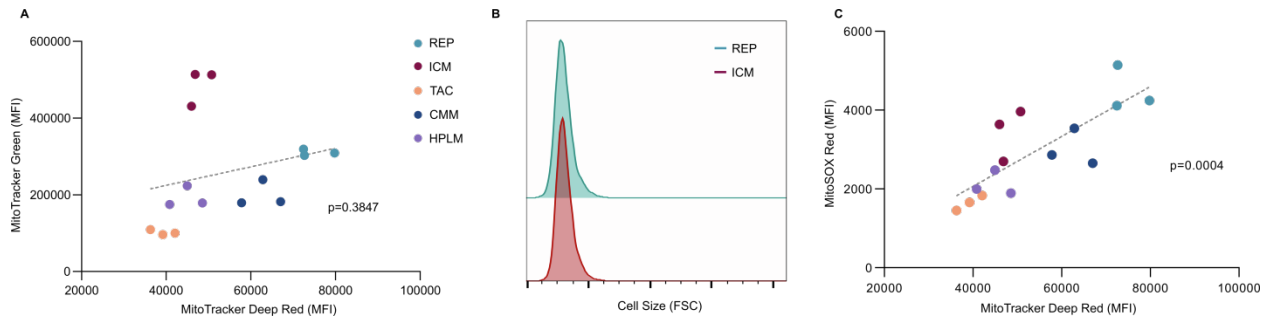

**Supplemental Figure 2: (A-C)** T cells from three healthy donors were expanded in 5 different conditions for 12 days. **(A)** Correlation between mitochondrial mass (MitoTracker Green) and mitochondrial activity (MitoTracker Deep Red) of live cells. **(B)** Representative plot of cell size of CD3<sup>+</sup> T cells in REP (blue) and ICM (red) conditions on day 12. **(C)** Correlation between mitochondrial ROS (MitoSOX) and mitochondrial activity (MitoTracker Deep Red) of live cells. Dashed line represents simple linear regression, p-value determined by Pearson correlation.

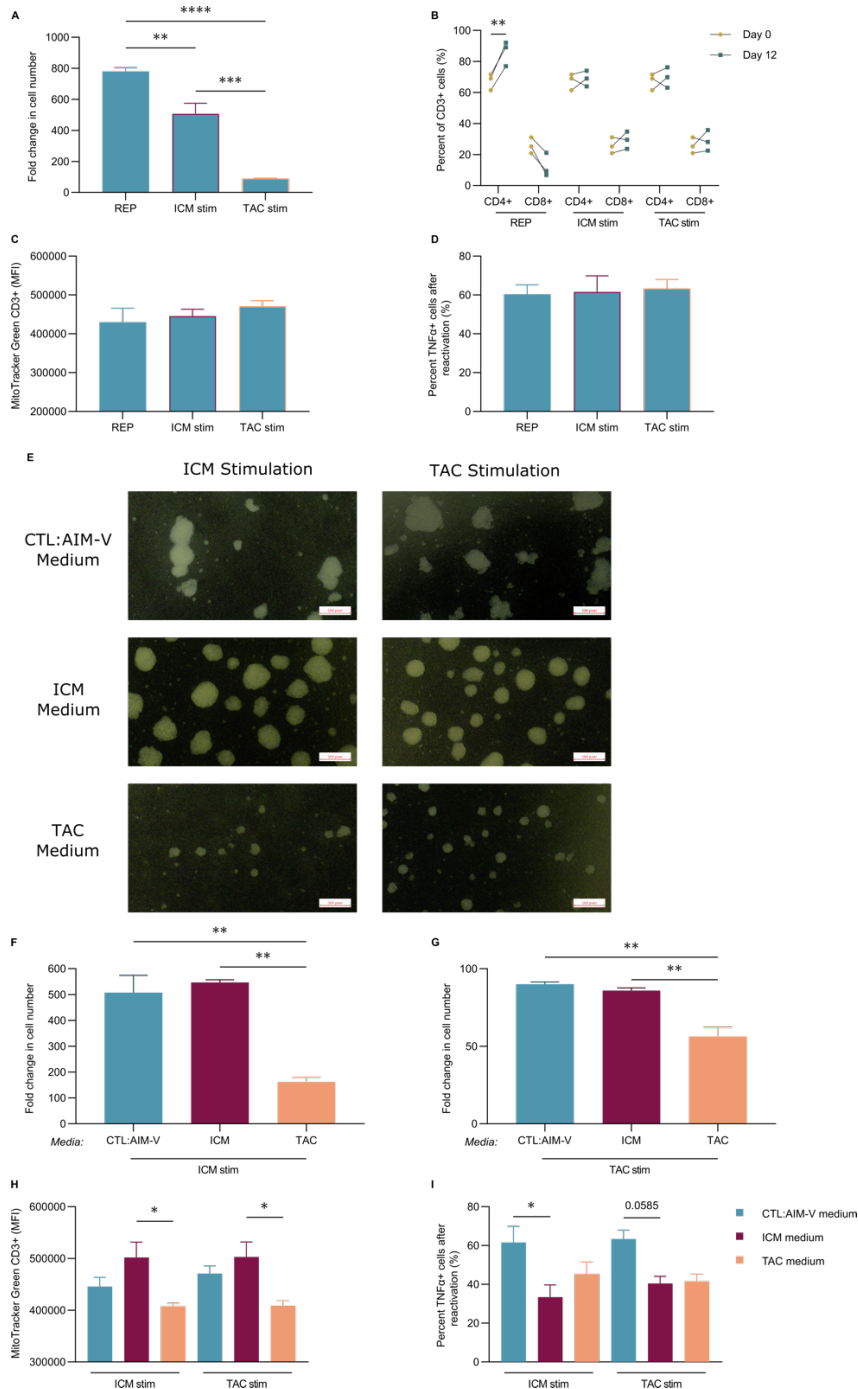

**Supplemental Figure 3: (A-D)** T cells from 3 healthy donors were expanded with 3 different stimulation protocols (REP, ICM, TAC) within the same medium (CTL:AIM-V) for 12 days. **(A)** Fold change in cell number from day 0 to 11. **(B)** Proportion of CD4<sup>+</sup> and CD8<sup>+</sup> T cells of live CD3<sup>+</sup> cells, pre- and post-expansion. **(C)** Median fluorescence intensity (MFI) of mitochondrial mass (MitoTracker Green). **(D)** Percentage of TNF $\alpha$  positive cells after CD3/CD28 reactivation following expansion. **(E-I)** T cells from 3 healthy donors were expanded in 3 different medias (CTL:AIM-V, ICM and TAC) and activated by either ICM or TAC methods for 12 days. **(E)** Microscope images of T cells 3 days after culture. Stimulation condition (column) and culture media (row) are indicated. Fold change in cell number from day 0 to 11 in ICM **(F)** or TAC **(G)** stimulated cells within different media. **(H)** Median fluorescence intensity (MFI) of mitochondrial mass (MitoTracker Green) **(I)** Percent TNF $\alpha$  positive of live cells after CD3/CD28 reactivation following expansion.

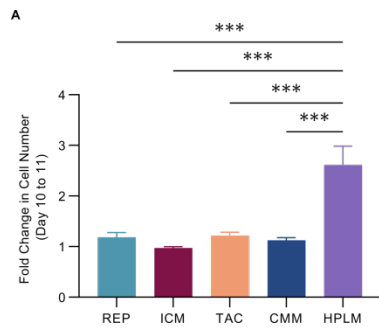

**Supplemental Figure 4: (A)** T cells from three healthy donors were expanded in 5 different conditions for 11 days. Fold change in cell number from day 10-11 in the respective conditions. Data are shown as mean of n=3 +SEM from healthy donors. Statistical significance was calculated one-way ANOVA (\*\* p<0.01, \*\*\* p<0.001).

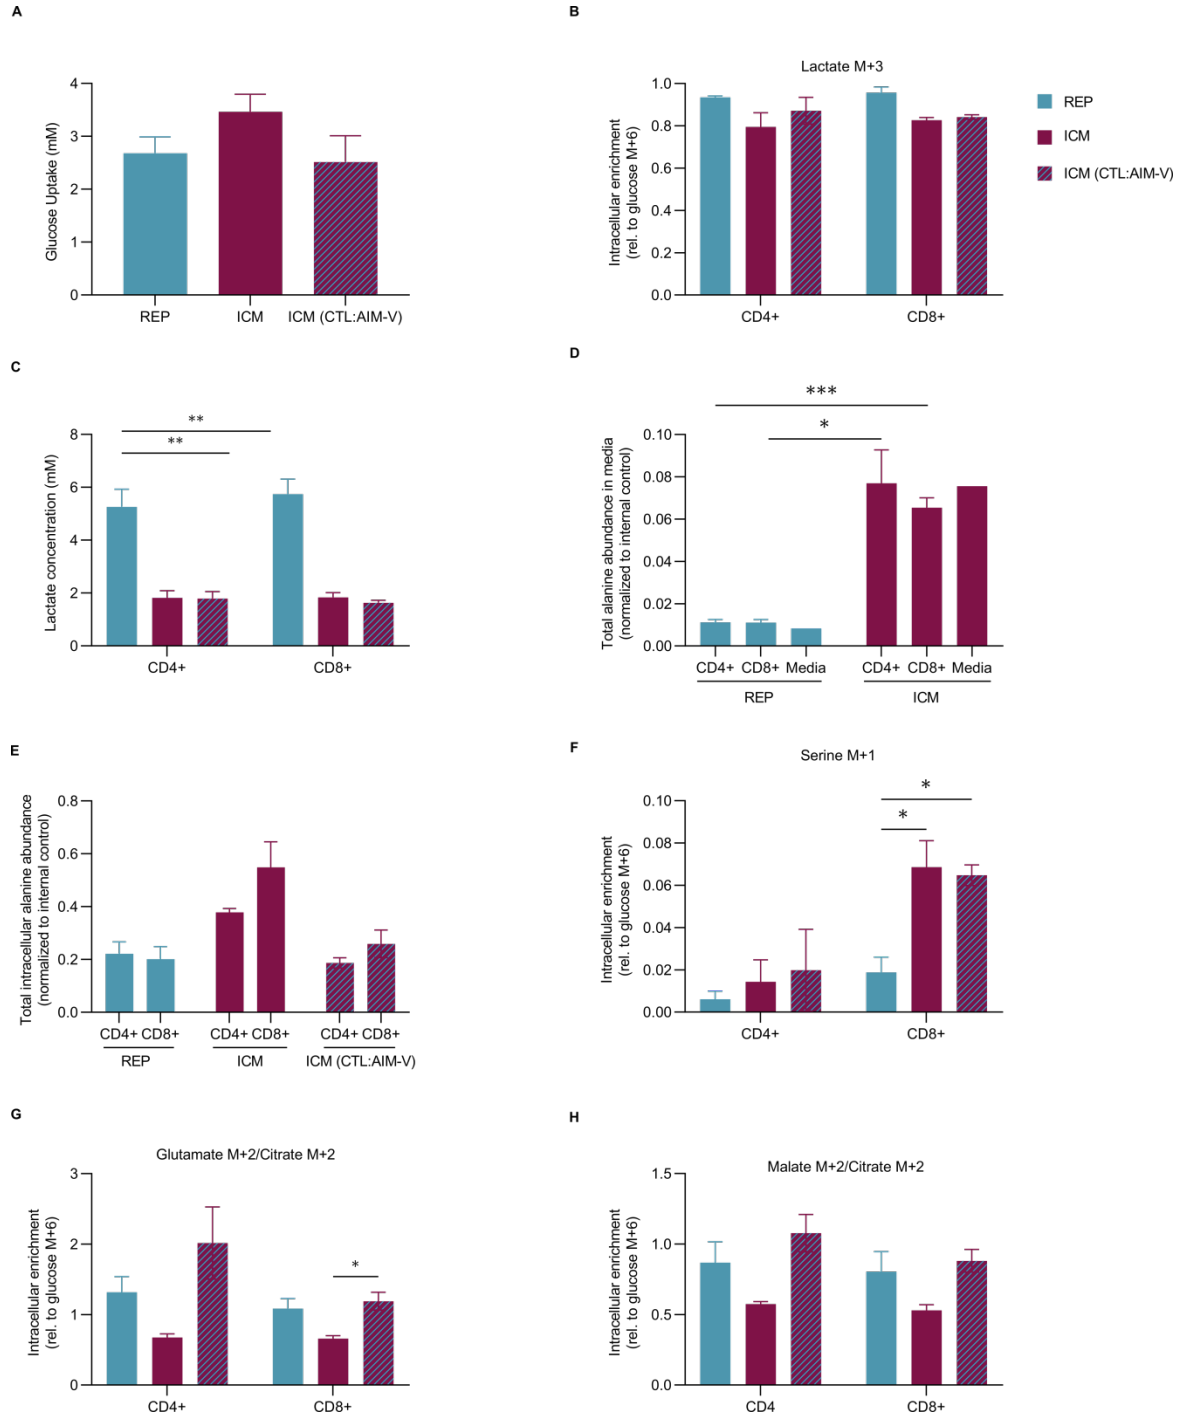

**Supplemental Figure 5: (A-H)** T cells from three healthy donors were expanded in REP and ICM for 11 days. On day 11, CD4+ and CD8+ cells were separated and incubated in [U-<sup>13</sup>C]glucose media for 24 hours: REP cells in CTL:AIM-V medium (blue bar), ICM cells in ICM medium (red bar) and ICM cells in CTL:AIM-V medium (red and blue dashes). **(A)** Glucose uptake from day 11-12 in CD4+ and CD8+ T cells. **(B)** Intracellular lactate M+3 relative to intracellular glucose M+6 enrichment. **(C)** Lactate concentration in media from day 11-12 in CD4+ and CD8+ T cells. **(D-E)** Alanine abundance calculated by totaling peak area of all alanine isotopologues and normalizing to internal control norvaline peak area. **(F)** Intracellular serine M+1 relative to intracellular glucose M+6 enrichment. **(G)** Glutamate M+2 and **(H)** malate M+2 relative to citrate M+2. Data are shown as mean of n=3 +SEM from healthy donors. Statistical significance was calculated by Student's t-tests (\* p<0.05, \*\* p<0.01, \*\*\* p<0.001).

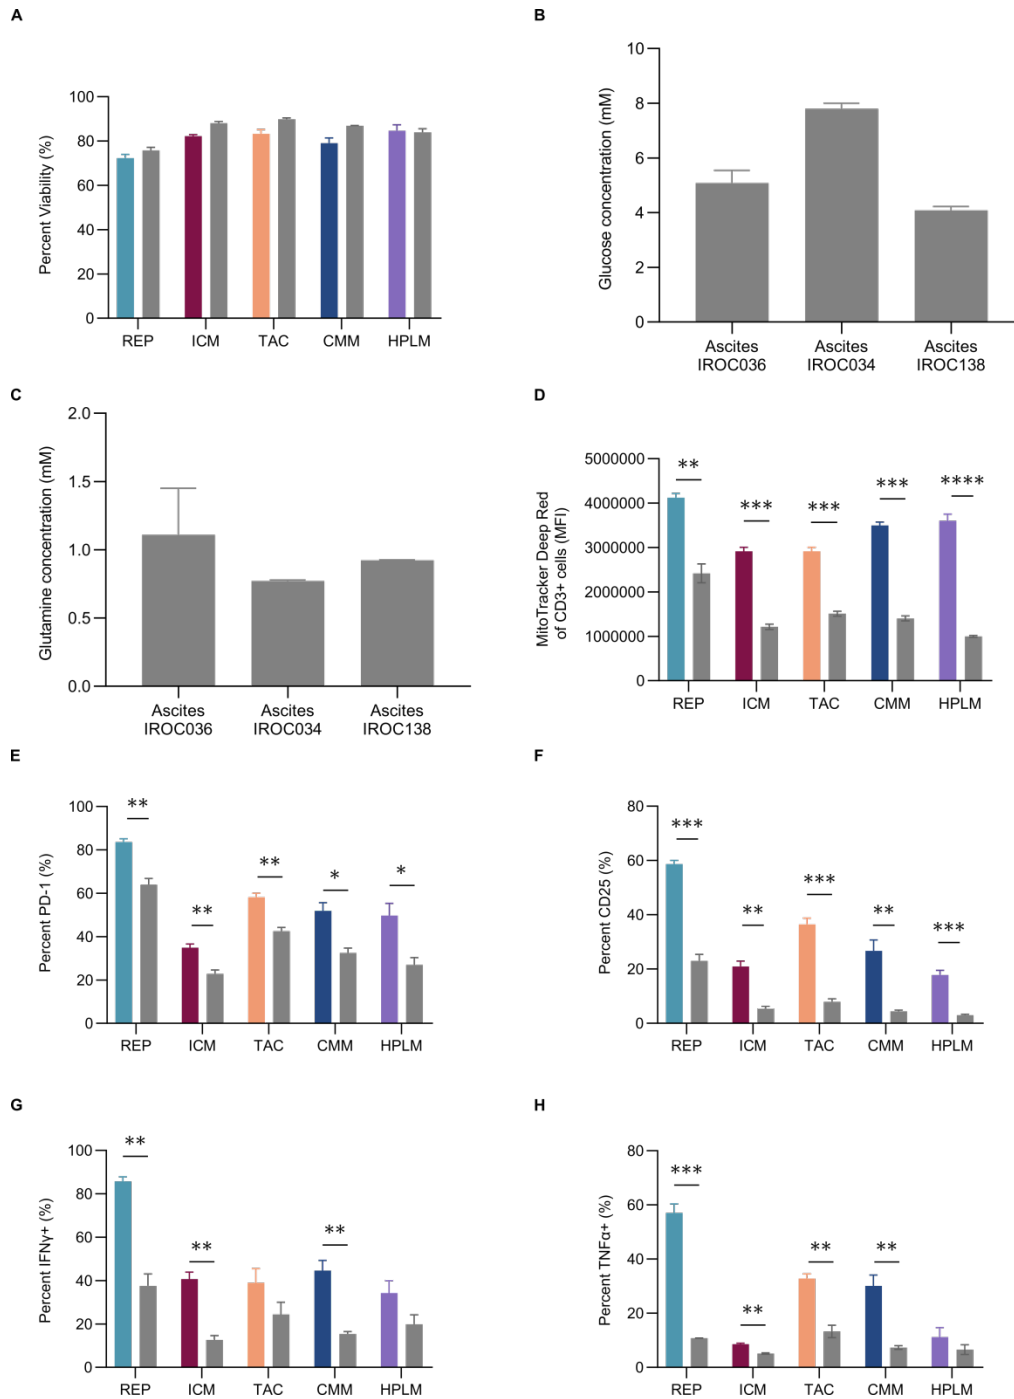

**Supplemental Figure 6: (A, D-H)** T cells from three healthy donors were expanded in 5 different conditions over 12 days. On day 12 T cell products were reactivated (CD3/CD28) in media (coloured bars) or ascites (grey bars), T cell metabolism and function was assessed after 2 days. **(A)** Percent viability of CD3+ T cells in media and ascites. **(B-C)** Glucose **(B)** and Glutamine **(C)** concentrations measured in primary ovarian cancer ascites fluid from three patients. **(D)** Median fluorescence intensity (MFI) of mitochondrial activity (MitoTracker Deep Red). Percentage of PD-1 **(E)**, CD25 **(F)**, IFN $\gamma$  **(G)**, and TNF $\alpha$  **(H)** positive cells of live CD3+ cells in the media and ascites. Data is shown as mean of n=3 +SEM from 3 healthy donors. Statistical significance was calculated by Student's t-tests (\* p<0.05, \*\* p<0.01, \*\*\* p<0.001, \*\*\*\* p<0.0001).

**Supplementary Table 1: Flow Cytometry Antibodies**

| <b>Fluorochrome</b> | <b>Marker</b>        | <b>Expression</b>      | <b>Clone</b> | <b>Company</b> | <b>Catalogue number</b> |
|---------------------|----------------------|------------------------|--------------|----------------|-------------------------|
| FITC                | TNF $\alpha$         | Function               | MAB11        | BD Biosciences | 554512                  |
| PE                  | IFN $\gamma$         | Function               | 4S.B3        | BD Biosciences | 554552                  |
| PE CF594            | FoxP3                | Tregs                  | 236A/E7      | BD Biosciences | 563955                  |
| PerCP               | CD8                  | Effector T cells       | RPA-T8       | BioLegend      | 301030                  |
| PerCP-eFluor710     | CD25                 | Activation             | 4E3          | Thermo         | 46-0257-41              |
| PE-Cy7              | CD45RO               | Phenotype              | UCHL1        | Thermo         | 25-0457-42              |
| ---                 | MitoTracker Deep Red | Mitochondrial activity | ---          | Thermo         | M22426                  |
| AF700               | CD4                  | Helper T cells         | RPA-T4       | BioLegend      | 300526                  |
| APC/Fire750         | CCR7                 | Phenotype              | G043H7       | BioLegend      | 353246                  |
| BV605               | CD137                | Activation             | 4B4-1        | BioLegend      | 309822                  |
| BV650               | PD1                  | Activation/Exhaustion  | EH12.2H7     | BioLegend      | 329950                  |
| BV750               | CD3                  | T cells                | SK7          | BioLegend      | 344845                  |
| ---                 | MitoTracker Green    | Mitochondrial Mass     | ---          | Thermo         | M7514                   |
| ---                 | MitoSOX Red          | Mitochondrial ROS      | ---          | Thermo         | M36008                  |
| eFlour506           | Viability            | Live/dead cells        | ---          | Thermo         | 65-0866-14              |
| FITC                | V $\beta$            | TCR                    | ---          | Beckman        | IM3497                  |
| PE                  | V $\beta$            | TCR                    | ---          | Beckman        | IM3497                  |
| ZombieNIR           | Viability            | Live/dead cells        | ---          | BioLegend      | 423105                  |
